# Supplementary material for: Whole blood transfusion in common marmosets: a clinical evaluation
Source: PubMed Central journal article supplement — Exp Anim. 2021 Nov 18;71(2):131–8. doi: 10.1538/expanim.21-0134 (PMC9130032; doi:10.1538/expanim.21-0134), 2021-11-18
Supplement: expanim-71-131-s001.pdf [file expanim-71-131-s001.pdf]

(A)

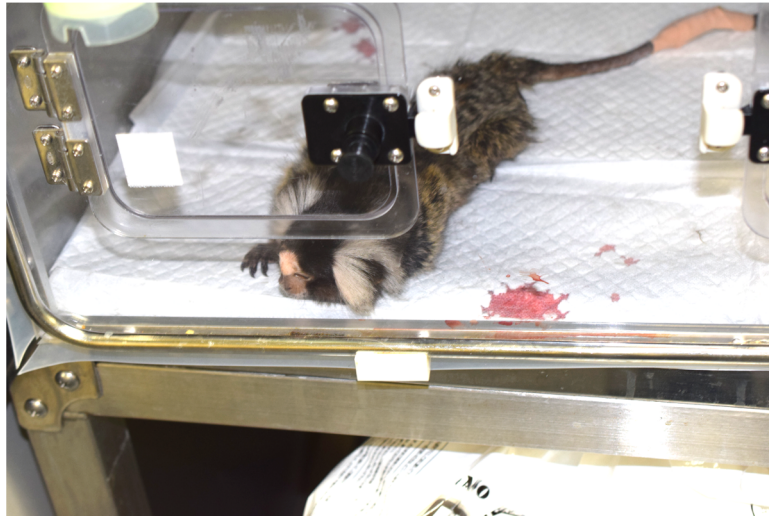

(B)

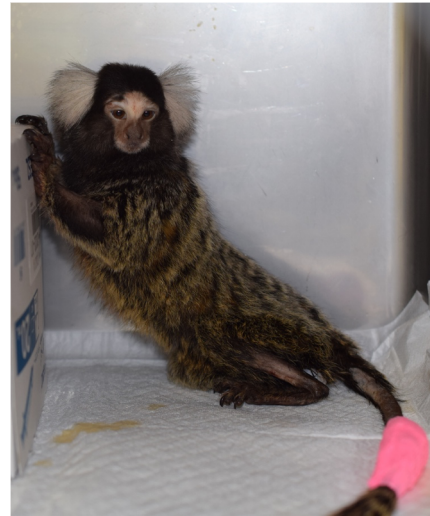

**Supplemental Fig. S1** (A) A comatose animal (no. R1) with severe anemia in the veterinary intensive care unit (ICU). (B) The animal recovered immediately after transfusion.

Supplemental table 1. Results of biochemical examination of blood for recipients

| No. |      | Alubmin<br>(g/dl) | BUN<br>(mg/dl) | Creatinine<br>(mg/dl) | ALT<br>(U/L) | GGT<br>(U/L) |
|-----|------|-------------------|----------------|-----------------------|--------------|--------------|
| R1  | Pre  | n/a               | n/a            | n/a                   | n/a          | n/a          |
|     | Post | 4.2               | 29.8           | 0.3                   | 3            | 5            |
| R2  | Pre  | n/a               | n/a            | n/a                   | n/a          | n/a          |
|     | Post | 5.1               | 24.5           | 0.2                   | 14           | n/a          |
| R3  | Pre  | 3.4               | 19.7           | 0.2                   | 1            | 1            |
|     | Post | 5.3               | 30.2           | 0.2                   | 10           | 1            |
| R4  | Pre  | 3.5               | 45.9           | 0.7                   | 8            | 5            |
|     | Post | 4.7               | 57.6           | 0.5                   | 5            | 8            |
| R5  | Pre  | 3.9               | 21.2           | 0.2                   | 18           | 9            |
|     | Post | 4.8               | n/a            | n/a                   | 4            | 12           |
| R6  | Pre  | 3.5               | 66.1           | 0.5                   | 3            | 3            |
|     | Post | 2.8               | n/a            | n/a                   | 5            | 1            |
| R7  | Pre  | 4.1               | 29.8           | 0.1                   | 7            | 1            |
|     | Post | 3.7               | 28.2           | 0.2                   | n/a          | 1            |
| R8  | Pre  | 4.3               | 25.5           | 0.3                   | 6            | 6            |
|     | Post | n/a               | n/a            | n/a                   | n/a          | n/a          |
| R9  | Pre  | 4.0               | n/a            | n/a                   | n/a          | n/a          |
|     | Post | 4.6               | 25.8           | 0.2                   | 14           | 3            |

BUN: blood urea nitrogen, ALT: alanine aminotransferase,  
GGT:  $\gamma$ -glutamyltranspeptidase, n/a: not applicable  
Pre: pre-transfusion, Post: post-transfusion

Supplemental table 2. Result of blood type sequence

| Animal no.      | Sequence         | Type |
|-----------------|------------------|------|
| R1              | <b>CTGgggGGG</b> | A    |
| R2              | <b>CTGgggGGG</b> | A    |
| R3              | <b>CTGgggGGG</b> | A    |
| R4              | <b>CTGgggGGG</b> | A    |
| R5              | <b>CTGgggGGG</b> | A    |
| R6              | <b>CTGgggGGG</b> | A    |
| R7              | <b>CTGgggGGG</b> | A    |
| R8              | <b>CTGgggGGG</b> | A    |
| R9              | <b>CTGgggGGG</b> | A    |
| D1              | <b>CTGgggGGG</b> | A    |
| D2              | <b>CTGgggGGG</b> | A    |
| D3              | <b>CTGgggGGG</b> | A    |
| D5              | <b>CTGgggGGG</b> | A    |
| D6              | <b>CTGgggGGG</b> | A    |
| D7              | <b>CTGgggGGG</b> | A    |
| C1 <sup>a</sup> | <b>CTGgggGGG</b> | A    |
| C2 <sup>b</sup> | <b>CTGgggGGG</b> | A    |
| C3 <sup>c</sup> | <b>CTGgggGGG</b> | A    |

<sup>a</sup>0-year-old female, <sup>b</sup>5-year-old female, <sup>c</sup>8-year-old male

Supplemental table 3. Results of CBC test for recipients

| No. | Periods <sup>a</sup> | WBC <sup>b</sup><br>(10 <sup>2</sup> /μL) | RBC <sup>c</sup><br>(10 <sup>4</sup> /μL) | Hemoglobin<br>(g/dl) | Hematocrit<br>(%) | MCV <sup>d</sup><br>(fL) | MCH <sup>e</sup><br>(pg) | MCHC <sup>f</sup><br>(g/dL) | Platelet<br>(10 <sup>4</sup> /μL) | Reticulocyte<br>(%) |
|-----|----------------------|-------------------------------------------|-------------------------------------------|----------------------|-------------------|--------------------------|--------------------------|-----------------------------|-----------------------------------|---------------------|
| R1  | pre                  | n/a                                       | n/a                                       | n/a                  | n/a               | n/a                      | n/a                      | n/a                         | n/a                               | n/a                 |
|     | post (47w)           | 94.0                                      | 305.0                                     | 8.2                  | 31.2              | 102.3                    | 26.9                     | 26.3                        | 67.0                              | 38.7                |
| R2  | pre                  | 115.8                                     | 211.0                                     | 5.0                  | 16.8              | 79.6                     | 23.7                     | 29.8                        | 42.7                              | 26.7                |
|     | post (18w)           | 85.9                                      | 657.0                                     | 16.1                 | 54.4              | 82.8                     | 24.5                     | 29.6                        | 119.1                             | 6.5                 |
|     | post (54w)           | 39.8                                      | 727.0                                     | 16.4                 | 54.6              | 75.1                     | 22.5                     | 30.0                        | 84.0                              | 7.9                 |
| R3  | pre                  | 154.1                                     | 186.0                                     | 3.9                  | 13.0              | 69.9                     | 21.0                     | 30.0                        | 53.2                              | 36.4                |
|     | post (8w)            | 131.5                                     | 703.0                                     | 14.8                 | 50.7              | 72.1                     | 21.1                     | 29.2                        | 71.4                              | 4.9                 |
| R4  | pre                  | 111.1                                     | 168.0                                     | 3.8                  | 12.6              | 75.0                     | 22.7                     | 30.2                        | 67.5                              | 29.1                |
|     | post (11w)           | 54.6                                      | 546.0                                     | 11.2                 | 37.0              | 67.8                     | 20.5                     | 30.3                        | 72.7                              | 2.2                 |
| R5  | pre                  | 40.6                                      | 635.0                                     | 14.5                 | 46.2              | 72.8                     | 22.9                     | 31.4                        | 62.7                              | 1.8                 |
|     | post (11w)           | 45.4                                      | 658.0                                     | 15.0                 | 49.0              | 74.5                     | 22.8                     | 30.6                        | 66.8                              | 4.4                 |
| R6  | pre                  | 66.9                                      | 289.0                                     | 6.3                  | 22.4              | 77.5                     | 21.8                     | 28.1                        | 84.7                              | 10.5                |
|     | post (29w)           | 41.6                                      | 536.0                                     | 12.3                 | 41.7              | 77.8                     | 23.0                     | 29.5                        | 84.7                              | 14.5                |
| R7  | pre                  | 71.9                                      | 598.0                                     | 13.1                 | 44.5              | 74.4                     | 21.9                     | 29.4                        | 59.3                              | 9.6                 |
|     | post (28w)           | 75.3                                      | 714.0                                     | 16.6                 | 55.7              | 78.0                     | 23.2                     | 29.8                        | 65.3                              | 5.7                 |
| R8  | pre                  | 83.7                                      | 517.0                                     | 10.6                 | 35.0              | 67.7                     | 20.5                     | 30.3                        | 76.2                              | 6.6                 |
|     | post (17w)           | 24.5                                      | 284.0                                     | 6.0                  | 21.0              | 73.9                     | 21.1                     | 28.6                        | 169.1                             | 6.5                 |
| R9  | pre                  | 119.4                                     | 589.0                                     | 13.7                 | 43.8              | 74.4                     | 23.3                     | 31.3                        | 57.8                              | 5.3                 |
|     | post (32w)           | 87.2                                      | 618.0                                     | 14.4                 | 47.8              | 77.3                     | 23.3                     | 30.1                        | 55.2                              | 10.0                |

<sup>a</sup>Shown in parentheses are post-transfusion periods, <sup>b</sup>WBC: white blood cells, <sup>c</sup>RBC: red blood cells, <sup>d</sup>MCV: mean corpuscular volume, <sup>e</sup>MCH: mean corpuscular hemoglobin, <sup>f</sup>MCHC: mean corpuscular hemoglobin concentration, n/a: not applicable
